# Supplementary material for: The Combination of Serious Gaming and Immersive Virtual Reality through the Constructivist Approach: An Application to Teaching Architecture
Source: MDPI journal article supplement (doi:10.3390/educsci12080536), 2022-08-09
Supplement: s1 [file s1]

## *Supplementary Material*

### **Survey**

**Telepresence:** (5-point Likert scale: 1 Strongly disagree, 2 Disagree, 3 Neither agree nor disagree, 4 Agree, 5 Strongly agree)

1. During the exercise, I felt like I was inside the world created by the computer.
2. During the computer exercise, I forgot that I was in the middle of an experiment.
3. During the computer exercise, my body was in the room but my mind was inside the world created during the experiment.
4. The computer-generated world looked like something I was visiting rather than something I was seeing.
5. I felt like I was inside the computer-generated world rather than surrounded by the real world while performing the computer experiment.
6. I forgot about my immediate surroundings while doing the computer exercise.
7. When the computer exercise ended, I felt like I had returned to the "real world" after a trip.

**AFFORDANCE** (5-point Likert scale: 1. Not at all, 2. A little, 3. Somewhat, 4. A lot, 5. Very much)

1. Are you familiar with the tool being used?
2. Did the proposed interaction seem simple/intuitive to you?
3. Was moving through the spaces simple/intuitive?
4. How easy did you find it to interact with objects in the environment?
5. Did I find it easy to adapt to the proposed way of interacting?

**PERCEPTIVE AND COGNITIVE ERGONOMICS** (5-point Likert scale: 1. Not at all, 2. A little, 3. Somewhat, 4. A lot, 5. Very much)

1. How understandable were the instructions?
2. Did you find it difficult to settle into virtual reality?
3. Did you perceive being placed in an immersive virtual environment as disturbing?
4. Did you perceive being placed in an immersive virtual environment as pleasant?
5. Did you perceive being placed in an immersive virtual environment as tiring?
6. Did you find it easy to follow the narrator's voice (Leonardo's) explaining the path?

7. Did you feel disoriented within the virtual environment?

**GSE: General self-efficacy** (5-point Likert scale: 1 Strongly disagree, 2 Disagree, 3 Neither agree nor disagree, 4 Agree, 5 Strongly agree)

1. I can always manage to solve difficult problems if I try hard enough.
2. If someone opposes me, I can find the means and ways to get what I want.
3. It is easy for me to stick to my aims and accomplish my goals.
4. I am confident that I could deal efficiently with unexpected events.
5. Thanks to my resourcefulness, I know how to handle unforeseen situations.
6. I can solve most problems if I invest the necessary effort.
7. I can remain calm when facing difficulties because I can rely on my coping abilities.
8. When I am confronted with a problem, I can usually find several solutions.
9. If I am in trouble, I can usually think of a solution.
10. I can usually handle whatever comes my way.

## Descriptive statistics

# Summary Statistics

| Variable | N  | Mean  | Std. Dev. | Min | Pctl. 25 | Pctl. 75 | Max |
|----------|----|-------|-----------|-----|----------|----------|-----|
| TELE1    | 35 | 4.257 | 0.95      | 2   | 4        | 5        | 5   |
| TELE2    | 35 | 3.686 | 0.993     | 1   | 3        | 4        | 5   |
| TELE3    | 35 | 4.314 | 0.932     | 2   | 4        | 5        | 5   |
| TELE4    | 35 | 3.971 | 0.857     | 2   | 3        | 5        | 5   |
| TELE5    | 35 | 3.743 | 1.146     | 1   | 3        | 5        | 5   |
| TELE6    | 35 | 4.2   | 1.106     | 1   | 4        | 5        | 5   |
| TELE7    | 35 | 4.114 | 0.993     | 1   | 4        | 5        | 5   |
| AFFO1    | 35 | 2.486 | 1.337     | 1   | 1        | 3        | 5   |
| AFFO2    | 35 | 4.257 | 0.701     | 3   | 4        | 5        | 5   |
| AFFO3    | 35 | 4.229 | 0.808     | 2   | 4        | 5        | 5   |
| AFFO4    | 35 | 3.857 | 0.912     | 1   | 3        | 4        | 5   |
| AFFO5    | 35 | 4.114 | 0.832     | 2   | 4        | 5        | 5   |
| ERGO1    | 35 | 4.457 | 0.611     | 3   | 4        | 5        | 5   |
| ERGO2    | 35 | 2.029 | 0.954     | 1   | 1        | 2        | 4   |
| ERGO3    | 35 | 1.829 | 0.923     | 1   | 1        | 2        | 4   |
| ERGO4    | 35 | 4.171 | 0.747     | 2   | 4        | 5        | 5   |
| ERGO5    | 35 | 1.829 | 0.923     | 1   | 1        | 2        | 4   |
| ERGO6    | 35 | 3.829 | 1.098     | 1   | 3        | 5        | 5   |
| ERGO7    | 35 | 2.143 | 1.167     | 1   | 1        | 3        | 5   |
| GSE1     | 35 | 3.971 | 0.707     | 3   | 3.5      | 4        | 5   |
| GSE2     | 35 | 3.629 | 0.843     | 1   | 3        | 4        | 5   |
| GSE3     | 35 | 3.6   | 1.035     | 1   | 3        | 4        | 5   |
| GSE4     | 35 | 3.314 | 0.9       | 1   | 3        | 4        | 5   |
| GSE5     | 35 | 3.486 | 0.742     | 2   | 3        | 4        | 5   |
| GSE6     | 35 | 3.971 | 0.618     | 3   | 4        | 4        | 5   |
| GSE7     | 35 | 3.657 | 1.027     | 1   | 3        | 4        | 5   |
| GSE8     | 35 | 3.314 | 0.867     | 1   | 3        | 4        | 5   |
| GSE9     | 35 | 3.514 | 0.742     | 1   | 3        | 4        | 4   |
| GSE10    | 35 | 3.4   | 0.881     | 1   | 3        | 4        | 5   |

TELE= Telepresence

AFFO=Affordance

ERGO=Ergonomics

GSE= General self-efficacy

[illegible]

# Reliability analysis

Call: psych::alpha(x = data[, 4:32])

| raw_alpha | std.alpha | G6(smc) | average_r | S/N | ase   | mean | sd  | median_r |
|-----------|-----------|---------|-----------|-----|-------|------|-----|----------|
| 0.71      | 0.73      | 0.96    | 0.086     | 2.7 | 0.071 | 3.6  | 0.3 | 0.088    |

| lower | alpha | upper | 95% confidence boundaries |
|-------|-------|-------|---------------------------|
| 0.57  | 0.71  | 0.84  |                           |

## Reliability if an item is dropped:

|       | raw_alpha | std.alpha | G6(smc) | average_r | S/N | alpha | se    | var.r | med.r |
|-------|-----------|-----------|---------|-----------|-----|-------|-------|-------|-------|
| TELE1 | 0.71      | 0.73      | 0.96    | 0.090     | 2.8 | 0.070 | 0.053 | 0.090 |       |
| TELE2 | 0.70      | 0.72      | 0.95    | 0.085     | 2.6 | 0.073 | 0.054 | 0.086 |       |
| TELE3 | 0.69      | 0.72      | 0.96    | 0.082     | 2.5 | 0.076 | 0.053 | 0.081 |       |
| TELE4 | 0.69      | 0.71      | 0.95    | 0.082     | 2.5 | 0.076 | 0.053 | 0.086 |       |
| TELE5 | 0.70      | 0.73      | 0.96    | 0.088     | 2.7 | 0.071 | 0.054 | 0.090 |       |
| TELE6 | 0.68      | 0.71      | 0.95    | 0.081     | 2.5 | 0.078 | 0.052 | 0.086 |       |
| TELE7 | 0.71      | 0.74      | 0.96    | 0.092     | 2.8 | 0.069 | 0.053 | 0.092 |       |
| AFFO1 | 0.73      | 0.74      | 0.96    | 0.094     | 2.9 | 0.064 | 0.053 | 0.092 |       |
| AFFO2 | 0.70      | 0.73      | 0.95    | 0.087     | 2.7 | 0.071 | 0.052 | 0.089 |       |
| AFFO3 | 0.71      | 0.73      | 0.96    | 0.089     | 2.8 | 0.070 | 0.050 | 0.089 |       |
| AFFO4 | 0.70      | 0.72      | 0.96    | 0.085     | 2.6 | 0.072 | 0.051 | 0.087 |       |
| AFFO5 | 0.71      | 0.74      | 0.96    | 0.091     | 2.8 | 0.069 | 0.050 | 0.089 |       |
| ERGO1 | 0.70      | 0.73      | 0.96    | 0.088     | 2.7 | 0.071 | 0.052 | 0.089 |       |
| ERGO2 | 0.71      | 0.74      | 0.95    | 0.093     | 2.9 | 0.069 | 0.051 | 0.087 |       |
| ERGO3 | 0.71      | 0.74      | 0.96    | 0.093     | 2.9 | 0.069 | 0.051 | 0.092 |       |
| ERGO4 | 0.72      | 0.74      | 0.95    | 0.094     | 2.9 | 0.069 | 0.051 | 0.090 |       |
| ERGO5 | 0.71      | 0.74      | 0.96    | 0.092     | 2.8 | 0.069 | 0.052 | 0.090 |       |
| ERGO6 | 0.71      | 0.73      | 0.96    | 0.088     | 2.7 | 0.071 | 0.053 | 0.089 |       |
| ERGO7 | 0.72      | 0.74      | 0.96    | 0.094     | 2.9 | 0.066 | 0.052 | 0.093 |       |
| GSE1  | 0.69      | 0.72      | 0.96    | 0.083     | 2.5 | 0.074 | 0.051 | 0.087 |       |
| GSE2  | 0.69      | 0.72      | 0.95    | 0.084     | 2.6 | 0.074 | 0.052 | 0.087 |       |
| GSE3  | 0.68      | 0.71      | 0.95    | 0.081     | 2.5 | 0.077 | 0.052 | 0.086 |       |
| GSE4  | 0.67      | 0.70      | 0.95    | 0.078     | 2.4 | 0.079 | 0.049 | 0.087 |       |
| GSE5  | 0.69      | 0.71      | 0.95    | 0.081     | 2.5 | 0.076 | 0.050 | 0.086 |       |
| GSE6  | 0.69      | 0.71      | 0.95    | 0.080     | 2.4 | 0.075 | 0.053 | 0.086 |       |
| GSE7  | 0.68      | 0.71      | 0.96    | 0.080     | 2.4 | 0.077 | 0.051 | 0.086 |       |

|       |      |      |      |       |     |       |       |       |
|-------|------|------|------|-------|-----|-------|-------|-------|
| GSE8  | 0.68 | 0.71 | 0.96 | 0.079 | 2.4 | 0.078 | 0.051 | 0.086 |
| GSE9  | 0.68 | 0.71 | 0.95 | 0.080 | 2.4 | 0.077 | 0.050 | 0.086 |
| GSE10 | 0.69 | 0.72 | 0.95 | 0.084 | 2.6 | 0.075 | 0.051 | 0.087 |

Item statistics

|       | n  | raw.r | std.r | r.cor | r.drop  | mean | sd   |
|-------|----|-------|-------|-------|---------|------|------|
| TELE1 | 35 | 0.206 | 0.198 | 0.182 | 0.0999  | 4.3  | 0.95 |
| TELE2 | 35 | 0.380 | 0.375 | 0.372 | 0.2775  | 3.7  | 0.99 |
| TELE3 | 35 | 0.501 | 0.488 | 0.478 | 0.4152  | 4.3  | 0.93 |
| TELE4 | 35 | 0.508 | 0.511 | 0.514 | 0.4300  | 4.0  | 0.86 |
| TELE5 | 35 | 0.304 | 0.267 | 0.241 | 0.1793  | 3.7  | 1.15 |
| TELE6 | 35 | 0.565 | 0.558 | 0.561 | 0.4704  | 4.2  | 1.11 |
| TELE7 | 35 | 0.170 | 0.123 | 0.107 | 0.0578  | 4.1  | 0.99 |
| AFFO1 | 35 | 0.069 | 0.045 | 0.022 | -0.0824 | 2.5  | 1.34 |
| AFFO2 | 35 | 0.246 | 0.295 | 0.292 | 0.1694  | 4.3  | 0.70 |
| AFFO3 | 35 | 0.178 | 0.217 | 0.211 | 0.0872  | 4.2  | 0.81 |
| AFFO4 | 35 | 0.332 | 0.368 | 0.364 | 0.2358  | 3.9  | 0.91 |
| AFFO5 | 35 | 0.126 | 0.155 | 0.144 | 0.0322  | 4.1  | 0.83 |
| ERGO1 | 35 | 0.213 | 0.257 | 0.238 | 0.1459  | 4.5  | 0.61 |
| ERGO2 | 35 | 0.114 | 0.092 | 0.083 | 0.0058  | 2.0  | 0.95 |
| ERGO3 | 35 | 0.131 | 0.102 | 0.093 | 0.0264  | 1.8  | 0.92 |
| ERGO4 | 35 | 0.026 | 0.054 | 0.051 | -0.0589 | 4.2  | 0.75 |
| ERGO5 | 35 | 0.160 | 0.113 | 0.104 | 0.0558  | 1.8  | 0.92 |
| ERGO6 | 35 | 0.274 | 0.273 | 0.268 | 0.1538  | 3.8  | 1.10 |
| ERGO7 | 35 | 0.089 | 0.054 | 0.033 | -0.0434 | 2.1  | 1.17 |
| GSE1  | 35 | 0.422 | 0.461 | 0.459 | 0.3529  | 4.0  | 0.71 |
| GSE2  | 35 | 0.419 | 0.441 | 0.441 | 0.3352  | 3.6  | 0.84 |
| GSE3  | 35 | 0.552 | 0.536 | 0.534 | 0.4623  | 3.6  | 1.03 |
| GSE4  | 35 | 0.634 | 0.639 | 0.646 | 0.5662  | 3.3  | 0.90 |
| GSE5  | 35 | 0.524 | 0.558 | 0.563 | 0.4592  | 3.5  | 0.74 |
| GSE6  | 35 | 0.553 | 0.588 | 0.591 | 0.5014  | 4.0  | 0.62 |
| GSE7  | 35 | 0.550 | 0.562 | 0.559 | 0.4610  | 3.7  | 1.03 |
| GSE8  | 35 | 0.612 | 0.606 | 0.602 | 0.5444  | 3.3  | 0.87 |
| GSE9  | 35 | 0.604 | 0.590 | 0.588 | 0.5458  | 3.5  | 0.74 |
| GSE10 | 35 | 0.435 | 0.421 | 0.418 | 0.3484  | 3.4  | 0.88 |

Non missing response frequency for each item

|       | 1    | 2    | 3    | 4    | 5    | miss |
|-------|------|------|------|------|------|------|
| TELE1 | 0.00 | 0.09 | 0.09 | 0.31 | 0.51 | 0    |

|       |      |      |      |      |      |   |
|-------|------|------|------|------|------|---|
| TELE2 | 0.03 | 0.09 | 0.26 | 0.43 | 0.20 | 0 |
| TELE3 | 0.00 | 0.06 | 0.14 | 0.23 | 0.57 | 0 |
| TELE4 | 0.00 | 0.03 | 0.29 | 0.37 | 0.31 | 0 |
| TELE5 | 0.06 | 0.09 | 0.20 | 0.37 | 0.29 | 0 |
| TELE6 | 0.03 | 0.09 | 0.09 | 0.26 | 0.54 | 0 |
| TELE7 | 0.03 | 0.03 | 0.17 | 0.34 | 0.43 | 0 |
| AFFO1 | 0.34 | 0.14 | 0.29 | 0.14 | 0.09 | 0 |
| AFFO2 | 0.00 | 0.00 | 0.14 | 0.46 | 0.40 | 0 |
| AFFO3 | 0.00 | 0.03 | 0.14 | 0.40 | 0.43 | 0 |
| AFFO4 | 0.03 | 0.03 | 0.23 | 0.49 | 0.23 | 0 |
| AFFO5 | 0.00 | 0.06 | 0.11 | 0.49 | 0.34 | 0 |
| ERGO1 | 0.00 | 0.00 | 0.06 | 0.43 | 0.51 | 0 |
| ERGO2 | 0.31 | 0.46 | 0.11 | 0.11 | 0.00 | 0 |
| ERGO3 | 0.46 | 0.31 | 0.17 | 0.06 | 0.00 | 0 |
| ERGO4 | 0.00 | 0.03 | 0.11 | 0.51 | 0.34 | 0 |
| ERGO5 | 0.46 | 0.31 | 0.17 | 0.06 | 0.00 | 0 |
| ERGO6 | 0.06 | 0.03 | 0.26 | 0.34 | 0.31 | 0 |
| ERGO7 | 0.37 | 0.31 | 0.14 | 0.14 | 0.03 | 0 |
| GSE1  | 0.00 | 0.00 | 0.26 | 0.51 | 0.23 | 0 |
| GSE2  | 0.03 | 0.06 | 0.26 | 0.57 | 0.09 | 0 |
| GSE3  | 0.06 | 0.09 | 0.20 | 0.51 | 0.14 | 0 |
| GSE4  | 0.03 | 0.17 | 0.29 | 0.49 | 0.03 | 0 |
| GSE5  | 0.00 | 0.09 | 0.40 | 0.46 | 0.06 | 0 |
| GSE6  | 0.00 | 0.00 | 0.20 | 0.63 | 0.17 | 0 |
| GSE7  | 0.06 | 0.06 | 0.23 | 0.49 | 0.17 | 0 |
| GSE8  | 0.03 | 0.14 | 0.34 | 0.46 | 0.03 | 0 |
| GSE9  | 0.03 | 0.06 | 0.29 | 0.63 | 0.00 | 0 |
| GSE10 | 0.03 | 0.11 | 0.34 | 0.46 | 0.06 | 0 |
